1 **Land Use Change Increases Wildlife Parasite Diversity in Anamalai Hills, Western Ghats,**  
2 **India**

3 **Debapriyo Chakraborty<sup>1,2</sup>, D. Mahender Reddy<sup>1</sup>, Sunil Tiwari<sup>1</sup>, Govindhaswamy**  
4 **Umamathy<sup>1\*</sup>**

5 <sup>1</sup> CSIR-Laboratory for the Conservation of Endangered Species, Centre for Cellular and  
6 Molecular Biology, Hyderabad 500048, India

7 <sup>2</sup> Present address: EP57 P C Ghosh Road, Kolkata 700048, India

8 \*guma@ccmb.res.in

9

10 **ABSTRACT**

11 Anthropogenic landscape change such as land use change and habitat fragmentation are  
12 known to alter wildlife diversity. Since host and parasite diversities are strongly connected,  
13 landscape changes are also likely to change wildlife parasite diversity with implication for  
14 wildlife health. However, research linking anthropogenic landscape change and wildlife  
15 parasite diversity is limited, especially comparing effects of land use change and habitat  
16 fragmentation, which often cooccur but may affect parasite diversity substantially  
17 differently. Here, we assessed how anthropogenic land use change (presence of plantation,  
18 livestock foraging and human settlement) and habitat fragmentation may change the  
19 gastrointestinal parasite diversity of wild mammalian host species (n=23) in Anamalai hills,  
20 India. We found that presence of plantations, and potentially livestock, significantly  
21 increased parasite diversity due possibly to spillover of parasites from livestock to wildlife.  
22 However, effect of habitat fragmentation on parasite diversity was not significant. Together,  
23 our results showed how human activities may increase wildlife parasite diversity within  
24 human-dominated landscape and highlighted the complex pattern of parasite diversity  
25 distribution as a result of cooccurrence of multiple anthropogenic landscape changes.

26

27 **Keywords:** Parasite diversity, Land use change, Plantation, Livestock, Human settlement,  
28 Anamalai hills, Habitat fragmentation, Rainforest

29

30 **INTRODUCTION:**

31 Land use change and habitat fragmentation are two major landscape-level outcomes of  
32 human activities that significantly impact biodiversity<sup>1-3</sup>. Consequently, considerable  
33 research on biodiversity change in human-dominated landscape have been conducted,  
34 which has resulted in improved understanding of how these two human impacts on  
35 landscape can impact biodiversity<sup>1,4,5</sup>. These anthropogenic factors can also modify host-  
36 parasite interactions, which, in turn, can lead to either increase or decrease in parasite  
37 diversity<sup>6-8,8</sup>. Understanding how these factors may influence parasite diversity is  
38 ecologically important for multiple reasons. For instance, parasites regulate host population  
39 dynamics<sup>9</sup>, alter species communities<sup>10</sup> and constitute a significant proportion of total  
40 biomass of any ecosystem<sup>11</sup>, which is not surprising considering parasites comprise at least  
41 40% of all animal species on earth<sup>12</sup>. Despite their ecological importance, our knowledge on  
42 parasite diversity is limited<sup>13,14</sup>, particularly in the context of increasing human impact on  
43 environment, underlining a significant research gap<sup>15,16</sup>. The gap is specifically wide for  
44 wildlife hosts and urgent research is required in the face of recent increased emergence of  
45 novel pathogens of wildlife origin<sup>7,17,18</sup>. It is, thus, crucial to answer how anthropogenic land  
46 use change and habitat fragmentation may impact parasite diversity in the wild.

47 Land use change can affect parasites both directly and indirectly. By altering  
48 environment (for example, through pollution), land use change may render transmission of  
49 environmentally-transmitted parasites difficult. This is particularly true for parasites that has  
50 life stages outside host body. However, land use change can indirectly impact parasite  
51 diversity by altering host diversity as it is one of the strongest predictors of parasite diversity  
52<sup>19-22</sup>. By decreasing host diversity and abundance, land use change can deplete richness of  
53 parasites particularly those that require multiple obligatory hosts<sup>23</sup>. This is evident when  
54 many host species that are threatened in their natural habitat appear to harbour fewer  
55 parasites<sup>24</sup>. On the other hand, land use change can also increase parasite diversity in  
56 multiple ways. Land use change can increase parasite diversity by increasing host diversity.  
57 For instance, land use change such as agricultural field or land-fill can act as resource traps  
58 and amplify host diversity artificially<sup>25</sup>. Land use change can also increase parasite diversity  
59 by introducing non-native parasites such as parasites of domestic and feral animals and  
60 even from humans<sup>26</sup>.

61 It is also important to distinguish between different types of land use change and  
62 their effects on parasites<sup>27</sup>. One type of land use change that has not been studied well is  
63 the effect of plantation on wildlife parasites<sup>27</sup>. Plantations are usually monocultures of  
64 exotic or native plant species grown as timber or fuel wood or as cash crops and have a  
65 large and increasing footprint in wildlife habitats worldwide<sup>28</sup>. They can sometime act as  
66 refuge to wildlife but usually with a biotic homogenising effect<sup>29,30</sup>. Consequently, plantation  
67 may also increase but homogenise parasite community. Plantations are often accompanied  
68 by settlement of labourers and livestock foraging<sup>31,32</sup>. These changes within a wildlife  
69 habitat can both increase or decrease parasite diversity. Parasite diversity may decrease if  
70 wildlife hosts avoid human areas to lessen confrontation with humans and resource  
71 competition with livestock. On the other hand, generalist species may actually thrive in  
72 human settlements by utilizing novel resources<sup>33,34</sup>. Herbivore species may also prefer to  
73 stay closer to human settlements and livestock (“spatial refugia”) that may displace  
74 predators<sup>35–38</sup>. Moreover, many wildlife, over time, may actually get habituated to humans  
75 and livestock and aggregate near human-dominated landscape<sup>39,40</sup>. These aggregations may  
76 eventually increase parasite diversity by increasing contact between native host species.  
77 Such situations may also increasingly expose wildlife to humans and human-associated  
78 animals such as livestock and commensals, increasing chance of spillover of non-native  
79 parasites to wildlife.

80 Habitat fragmentation may lead to higher parasite diversity because heavily  
81 fragmented habitats may disrupt wildlife dispersal and increase host diversity in smaller  
82 fragments. Such increase in host diversity in a smaller patch may alter host characteristics  
83 such as home range, abundance and intra and interspecific contacts thus increasing overlap  
84 among host species making host individuals exposed to higher parasite infections<sup>41,42</sup>.  
85 These effects are likely to be greatest in the smallest and most isolated of the fragments<sup>3,43</sup>.  
86 By disrupting host dispersal, fragmentations can also adversely affect parasite diversity. This  
87 could be especially true for parasites who require multiple host species to complete its life  
88 cycle, such as those that are transmitted trophically<sup>44</sup>. So far, many studies looked into this  
89 effect but the results have been mixed<sup>6,41,45–47</sup>.

90 The Anamalai (Elephant hills in *Tamil*) hills of southern India is a highly biodiverse  
91 rainforest habitat of Western Ghats, which holds about 30% of India's plant and vertebrate

92 species diversity in less than 6% of the country's area <sup>48</sup>. It is also one of the most altered  
93 natural habitats in India and typifies different levels of land use change and habitat  
94 fragmentation rampant in Indian wildlife habitats. Large section of the habitat is highly  
95 modified due to land use change, bordered by large, relatively undisturbed tropical  
96 rainforests. The landscape is a matrix of over 40 rainforest fragments (1-2,500 ha in  
97 size), often surrounded by plantations (coffee, tea and cardamom), roads, hydroelectric  
98 dams and settlements <sup>49</sup>. Highly-modified fragments contain within them human  
99 settlements and have higher livestock pressures than other remote, less disturbed  
100 fragments. In spite of such high levels of land use change and habitat fragmentation, the  
101 Anamalai hills still harbour a large number of wildlife whose ranges often unavoidably  
102 overlap with humans and livestock <sup>50-53</sup>. In fact, large number of wildlife species are  
103 regularly observed within human-dominated habitats and this concurrence with humans  
104 often precipitates into wildlife-human conflicts <sup>49,50,54-56</sup>. It is possible that many of the  
105 wildlife are important reservoirs of multiple environmentally-transmitted parasites. In fact,  
106 recent studies have recorded important parasite groups within certain host species  
107 populations that may cause Ascariasis, Trichuriasis and Strongyloidiasis in humans <sup>45,46,57,58</sup>.

108 To assess the effect of land use change (plantation, livestock foraging and human  
109 settlements) and habitat fragmentation on parasite diversity, we studied gastrointestinal  
110 parasites of wild mammalian hosts across rainforest fragments in Anamalai hills. Using  
111 statistical models, we tested effects of land use change and habitat fragmentation on  
112 parasite diversity. We predicted a positive impact of land use change on parasite diversity  
113 due to increased host diversity and an increased exposure of wildlife to humans and  
114 livestock. For habitat fragmentation too, we predicted an increase in parasite diversity with  
115 decrease in habitat size and increase in habitat isolation. Our alternative predictions were  
116 that land use change and habitat fragmentation could actually deplete parasite diversity by  
117 decreasing host diversity in disturbed fragments. Finally, land use change and habitat  
118 fragmentation may not significantly impact parasite diversity either by not impacting host  
119 community or by not spillover from non-native hosts such as livestock and humans.

120 **MATERIALS AND METHODS:**

121 **Ethical statement:** For this study, faecal samples were collected only noninvasively. As a  
122 result, no animal was sacrificed or harmed during sampling. Part of the sampling was done  
123 within Anamalai Tiger Reserve, which is a protected area. Hence, appropriate written  
124 permission was taken from the Tamil Nadu Forest Department (Letter Ref. No. WL  
125 5/58890/2008, dated 2nd September 2009).

126 **Study site:** Located south of the Palghat gap (11° N) of the Western Ghats, Anamalai hills  
127 once had large tracts of tropical rainforest dotted with few tribal settlements. Between  
128 1860 and 1930, British colonisers started clearing the rainforests extensively for cultivation  
129 of tea and coffee and developing teak and *Eucalyptus* plantations, particularly in the  
130 Valparai Plateau<sup>59</sup>. As a result, the Anamalais today consists of both a relatively  
131 undisturbed, large (958.59 km<sup>2</sup>) tropical rainforest within the protected Anamalai Tiger  
132 Reserve (ATR; 10°12'–10°35'N and 76°49'–77°24'E) and about 1,000 ha highly degraded  
133 Valparai Plateau (Figure 1). The plateau consists of many tea estates and other plantations,  
134 which are surrounded by four protected areas—ATR in Tamil Nadu state and three others in  
135 Kerala state. The major vegetation types include scrub forests in the rain-shadow areas in  
136 the eastern foothills, dry and moist deciduous forests (<800 m), mid-elevation tropical wet  
137 evergreen forest (600-1,500 m) and high-altitude shola-grassland ecosystems (>1,500 m)<sup>60</sup>.  
138 Although a large part of the tropical wet evergreen forests occurs within ATR, many of the  
139 smaller (< 200 ha) fragments are found in private estates in the Valparai plateau. These  
140 small fragments are highly degraded and disturbed due to fuel-wood collection and  
141 livestock grazing. Valparai town also is a part of the plateau and around 200,000 people live  
142 across the town and plantations<sup>60</sup>. Due to the ongoing habitat fragmentation, the whole  
143 landscape is a matrix of over 40 rainforest fragments, ranging 1 ha-2,500 ha in size and  
144 often surrounded by plantations (coffee, tea and cardamom), roads, hydroelectric dams and  
145 settlements<sup>49</sup>. Based on size range (2-2,500 ha), level of perceived human disturbance and  
146 access, we selected 19 mid-elevation tropical rainforest and three low-elevation dry and  
147 moist deciduous forest fragments for sampling (Figure 1).

148 **Host sampling:** Between Oct 2013 and Oct 2015, faecal samples were collected from  
149 populations of mammalian wildlife. We collected fresh faecal samples, non-invasively during  
150 the day, on transects (400 m-3 km in length). For large and medium herbivores and

151 primates, we followed individuals and collected fresh faeces when animals defaecated. For  
152 elusive species such as carnivores, we identified home range based on secondary  
153 information and faecal samples were identified based on morphology and also using nearby  
154 secondary signs such as pug-marks or hoof-prints. To avoid sampling the same individual  
155 repeatedly, only one sample of a host species was collected from each spot and the sample  
156 source was either marked or removed. To avoid contamination from soil, samples were  
157 collected from the inside of the bolus or only top pellet was collected from a heap. We  
158 immediately fixed each sample in 10% formaldehyde solution (50 ml), labelled the  
159 containers with the information of origin (fragment name, date, Time and host species) and  
160 stored them at room temperature until parasitological screening. Differences in sampling  
161 effort can confound the comparison of diversity among replicates. We accounted for  
162 differences in number of host species encountered by calculating richness estimates with  
163 the assumption that each faecal sample represents single individual. We used bootstrap,  
164 which is a resampling method for estimating the whole sampling distribution of richness by  
165 sampling with replacement from the original sample and can offer greater precision than  
166 jackknife estimates, especially when sample sizes are small <sup>61</sup>.

167 **Parasite sampling:** Employing both the flotation and sedimentation techniques (NaNO<sub>3</sub>  
168 solution), we screened the faecal samples for the presence of helminth eggs, larvae and  
169 protozoan cysts <sup>62</sup>. For each parasite concentration technique, we examined two slides per  
170 sample. Slides were examined under a light microscope (400X). Eggs and cysts were first  
171 examined at 10× magnification and then their size was measured with a micrometre  
172 eyepiece (0.1 µm) at 40× magnification. To facilitate identification of parasite eggs, we often  
173 added a drop of Lugol's iodine solution to the slides, which highlighted detailed structures.  
174 In addition, photographs of each parasite species have been archived and are available for  
175 examination by request to the corresponding author. We identified parasites to the lowest  
176 possible taxonomic level using published keys <sup>63,64</sup>. Differences in sampling effort can  
177 confound the comparison of diversity among replicates. We accounted for differences in  
178 number of parasite taxon encountered by calculating richness estimates with the  
179 assumption that each faecal sample represents single host individual. We used bootstrap,  
180 which is a resampling method for estimating the whole sampling distribution of richness by  
181 sampling with replacement from the original sample. Bootstrap can offer greater precision

182 over jackknife estimator, especially when sample sizes are small<sup>61</sup>. This method is  
183 particularly recommended for parasite richness estimation<sup>65</sup>.

184 **Land use data:** In Anamalai hills, land use change manifests in largely three forms—  
185 presence of human settlements, plantations and livestock foraging. There are only few large  
186 (>1000 ha) fragments that are legally protected and thus undisturbed. Many of the studied  
187 fragments share more than one type of land use change. For instance, some fragments with  
188 human settlements may also have livestock present. For the current study, we identified 18  
189 fragments with land use change, out of which 15 (83.3%) had plantation, in contrast to three  
190 (16.7%). Eleven (61.1%) of the fragments have significant livestock foraging pressure, in  
191 contrast to seven (38.9%) fragments without livestock. Finally, ten (55.6%) of the fragments  
192 had human settlements within them, in contrast to eight (44.4%) without settlements.

193 **Habitat fragmentation data:** To measure effect of habitat fragmentation, we used fragment  
194 size and isolation distance between fragments. According to the equilibrium theory of island  
195 biogeography, organism dispersal probability declines as distance between islands  
196 increases, reducing rates of immigration and, in turn, reducing diversity (MacArthur &  
197 Wilson, 1963, 1967; Whittaker & Fernandez-Palacios, 2007). Assuming each forest fragment  
198 as an island, their isolation was summarized with an isolation index which was calculated as  
199 the sum of the square root of the distances to the nearest equivalent (no smaller than 80%  
200 of size) or larger fragment (Dahl, 2004). Data on fragment size, distance between fragments  
201 and presence of human settlements, plantations and livestock were collected from earlier  
202 studies from Anamalai hills<sup>45,60</sup>.

203 **Data analyses:** To assess the effects of land use change and habitat fragmentations on  
204 bootstrap estimate of parasite taxon richness, we created two different linear mixed effects  
205 models<sup>66</sup>. Each model included random effects of host species and fragments to account for  
206 multiple observations within each fragment (across host species) and across fragments. In  
207 the land use model, the predictor variables (fixed effects) were presence of plantation,  
208 human settlement and livestock. The predictor variables for the habitat fragmentation  
209 model were fragment size and fragment isolation index. In both the models, we  
210 incorporated both bootstrap estimates of host species richness and host body mass as co-  
211 predictors as these were known to effect parasite richness. We retrieved host body mass  
212 data from online ecological database<sup>67</sup>. After fitting these model to the data, we also

213 compared and selected the best fit model using lowest AIC value<sup>68</sup>. At the end, diagnostics  
214 were run to check distribution of the residuals for each model. This analysis was conducted  
215 in the lme4 package<sup>69</sup>. We also assessed the effects of land use change and habitat  
216 fragmentation on bootstrap estimates of host species richness using two linear models. In  
217 the land use model, the predictor variables were presence of plantation, human settlement  
218 and livestock. The predictor variables for the habitat fragmentation model were fragment  
219 size and fragment isolation index. We followed the same strategy as described above for  
220 model fitting, fitting diagnostics and model selection. Finally, we tested whether land use  
221 change homogenized the composition of the parasite community. We used a multivariate  
222 nonparametric Analysis of Variance (permAnoVa; 1,000 permutations) based on the Jaccard  
223 dissimilarity index for a matrix of parasite presence/absence. We calculated the variance of  
224 homogeneity of parasite communities within each fragment based on disturbed vs.  
225 undisturbed divisions using the betadisper function of the vegan package in R<sup>70</sup>.

226

## 227 **RESULTS:**

228 **Sample diversity:** From 19 forest fragments, we collected 4,056 mammalian faecal samples  
229 belonging to 23 mammalian wildlife species and two livestock species—domestic goats  
230 (*Capra aegagrus*) and cattle (*Bos taurus*). Analyses were done only on wildlife samples.  
231 Number of samples varied from 41 in Uralikal to 495 in Puthuthottam (Table 1). Number of  
232 samples for each host species varied between six in Otter (*Lutra lutra*) and 623 in gaur (*B.*  
233 *gaurus*). In total, seven protozoa (18.42%) and 32 helminth (81.58%) species were recorded,  
234 including five trematodes, five cestodes and 20 nematodes. At least seven different  
235 parasites, belonging to different parasite groups, were recorded in  $\geq 20$  different host  
236 species—protozoa *Coccidia sp.* (23 hosts); cestodes *Hymenolepis nana* (20 hosts) and  
237 *Moniezia sp.* (22 hosts); and nematodes *Gongylonema sp.* (20 hosts), *Strongyloides sp.* (23  
238 hosts), *Trichuris sp.* (24 hosts) and *Ascaris sp.* (26 hosts). On the other hand, cestode  
239 *Dipylidium sp.* and nematode *Parascaris sp.* were found only in civet and Indian porcupine  
240 (*Hystrix indica*) samples, respectively.

241 **Host and parasite diversity and disturbance:** For parasite diversity analysis the human  
242 disturbance model was the best fit (Table 2). Parasite diversity was significantly driven by



243 presence of plantation (estimate = 4.779,  $CI_{Profile} = 0.326 - 9.232$ ,  $t = 2.103$ ,  $p < 0.05$ ).  
244 Presence of livestock had a substantial but not significant positive effect (estimate = 3.209,  
245  $CI_{Profile} = -0.052 - 6.366$ ,  $t = 1.992$ ,  $p > 0.05$ ). Effects of settlement, host richness and host body  
246 mass on parasite richness were not significant (Figure 2). For host diversity analysis the  
247 human disturbance model was again the best fit (Table 3). Presence of plantation was the  
248 only predictor that had a significant positive effect on host diversity (estimate = 10.798,  
249  $CI_{Profile} = 2.302 - 19.294$ ,  $t = 2.726$ ,  $p < 0.05$ )—almost half of all host species occur in  
250 plantations. Although presence of livestock did not have a significant effect, its wide  
251 confidence interval was mostly on the positive side suggesting potential positive impact—  
252 limited by sample size—on host richness (estimate = 5.602,  $CI_{Profile} = -0.639 - 11.843$ ,  $t =$   
253  $1.925$ ,  $p > 0.05$ ). Similarly, presence of human settlement did not significantly affect host  
254 richness, however, the substantial effect was mostly on the negative side, suggesting  
255 potential negative effect on host diversity (estimate = -4.112,  $CI_{Profile} = -10.717 - 2.492$ ,  $t = -$   
256  $1.335$ ,  $p > 0.05$ ).

257 We recorded 12 parasites (ten helminths and two protozoa) that occurred only in  
258 plantations. Six of the ten helminths were nematodes (60%), while rest were trematodes  
259 (30%) and one cestode (10%). Fragments without plantations did not harbour any parasite  
260 taxon exclusively, which means parasites in those undisturbed fragments also occurred in  
261 plantations. Fragments with livestock harboured three parasite taxa (two nematodes and  
262 one cestode) exclusively relative to their undisturbed counterpart. However, only one  
263 parasite taxon (*Taenia sp.*) exclusively occurred in livestock disturbed fragments, while other  
264 two nematodes also occurred in the plantations. Its counterpart undisturbed fragments only  
265 harboured one taxon exclusively (*Paragonimus sp.*), which however also occurred in  
266 plantations. Finally, settlements harboured three nematode taxa exclusively in comparison  
267 to their undisturbed counterpart. Only one of these taxa (*Uncinaria sp.*) were exclusive to  
268 settlements across all fragments. Undisturbed counterpart of settlements harboured only  
269 one parasite taxon (*Sarcocystis sp.*) exclusively.

270 **Parasite and host homogeneity:** Parasite communities within disturbed forest fragments  
271 were not significantly more homogeneous than the undisturbed ones due to presence of  
272 either plantations ( $F = 2.58$ ,  $p > 0.05$ ), livestock ( $F = 0.04$ ,  $p > 0.05$ ) or settlements ( $F = 3.55$ ,  
273  $p > 0.05$ ). Host communities within plantations (TukeyHSD;  $p < 0.05$ ; Figure 4a) and human

274 settlements (TukeyHSD;  $p < 0.05$ ; Figure 4b) were, however, significantly more homogeneous  
275 than undisturbed fragments. Finally, we did not find any of the disturbance variables to  
276 significantly alter the parasite community composition between undisturbed and disturbed  
277 fragments.

278

## 279 **DISCUSSION:**

280 Our results reveal that rainforest fragments with plantations (and potentially with livestock)  
281 in Anamalai hills harbour significantly higher parasite diversity than undisturbed fragments.  
282 Interestingly, some of the modified fragments (at least, fragments with plantations) also has  
283 significantly more host diversity than the undisturbed fragments, however host diversity  
284 was not found to significantly affect parasite diversity.

285 In Anamalai hills, plantations (coffee, tea and cardamom) had more mammalian  
286 wildlife species richness than the undisturbed fragments. This was not particularly a  
287 surprising result because studies have reported similar high richness in vertebrate species  
288 from plantation within wildlife habitats<sup>71,72</sup>. In fact, earlier studies from Western Ghats also  
289 found high vertebrate richness within or around plantations with large variations depending  
290 on plantation types, from open tea to more shaded coffee and cardamom plantations  
291<sup>30,73,74</sup>. The reason for such increased host diversity is thought to be an increase in habitat  
292 heterogeneity within plantations. Increased habitat heterogeneity is thought to generate  
293 greater diversity of niches consequently facilitating cooccurrence of many species<sup>75,76</sup>.  
294 However, such increase in species richness is often accompanied by more generalist and  
295 wide-ranging species being more abundant within the plantations and a loss of community  
296 heterogeneity relative to undisturbed habitats<sup>77-79</sup>. We found similar loss of heterogeneity  
297 for host species in disturbed habitats with plantations and settlements (Figure 4).

298 Effect of livestock presence on host species richness was positive but not statistically  
299 significant at  $\alpha = 0.05$ . The effect, however, was significant at  $\alpha = 0.10$ , which suggested  
300 potential, but weak effect, which was reflected by the almost equal number of wildlife  
301 species recorded from these two groups of fragments ( $n_{\text{Livestock}} = 20$  and  $n_{\text{Undisturbed}} = 22$ ).  
302 Interaction between livestock and wildlife is complicated. For instance, while a number of  
303 studies found evidence of competitive exclusion between livestock and large herbivore<sup>80</sup>,

304 may other recorded resource sharing between these two groups<sup>81,82</sup>. Yet still, may other  
305 studies did not find any relationship between the two<sup>83</sup>. The outcome of the interaction  
306 may depend on the ecological similarity between the two groups (Niche overlap),  
307 availability of natural resources that may vary between habitats (between low to high  
308 productivity) and also degree of behavioural habituation by the wildlife. The wildlife  
309 community that we studied was an ecologically broad one consisting of wildlife with very  
310 different ecology. Therefore, while some of the species—such as spotted deer and sambar  
311 deer, who were found only in the undisturbed fragments—may face resource competition  
312 from livestock grazing, others (for example, small carnivores and primates) may not face any  
313 competition. In addition, many large herbivores, such as gaur and elephants, who despite  
314 resource competition may still use the disturbed fragments as corridors contributing to host  
315 richness. These processes together may explain almost similar host species richness  
316 between fragments with and without livestock grazing.

317         We did not find any significant effect of human settlement on host diversity but the  
318 trend is negative (Figure 3). While human settlement may attract and facilitate generalist  
319 and weedy species with high tolerance for disturbance (for example, rodents, which were  
320 not sampled in the present study), many elusive species such as carnivores may be  
321 adversely affected and may prefer to avoid fragments with settlements<sup>84</sup>. Still, we recorded  
322 overall a large host species richness ( $\text{host richness}_{\text{Settlement}} = 19$ ,  $\text{host richness}_{\text{Undisturbed}} = 23$ )  
323 from around the settlement in Anamalai hills. This could be explained by the facts that many  
324 of these settlements may attract wildlife with unintentionally supplemented resources such  
325 as planted fruit trees<sup>60</sup>. Additionally, the high level of fragmentation of the landscape  
326 meant large herbivores and carnivores may not have much choice but to disperse through  
327 human settlements<sup>54,56</sup>. We did not find evidence of habitat fragmentation (fragment size  
328 and isolation) influencing host species richness in Anamalai hills (Figure 3). This is in line with  
329 findings from across studies that effects of fragmentation on species communities are often  
330 weak<sup>85</sup>. Effects of habitat fragmentation on species diversity is highly context-specific and  
331 varies considerably between animal groups, ecosystems and kinds of human activities  
332 prevalent in the landscape<sup>85–89</sup>. In Anamalai hills, habitat fragmentation is widespread,  
333 which likely disrupt animal movement to some extent but, in the absence of hunting,  
334 perhaps not substantially. For instance, studies recorded use of certain plantation as

335 corridors to connect with isolated undisturbed habitats<sup>51,52,74</sup>. However, the adverse outcome  
336 of these movement through human-dominated habitats is the increase in wildlife-human  
337 conflict<sup>54,56</sup>.

338         Among the different types of land use change in Anamalai hills, plantations had the  
339 strongest positive effect on parasite diversity (Figure. 2). Increase in number of parasite taxa  
340 in modified fragments ranged between one to ten, with eight parasite taxa that were  
341 recorded exclusively in these fragments (Table 4). However, this increased richness in  
342 disturbed fragments were likely not driven by host richness as host richness had a small and  
343 statistically not significant effect on parasite richness in the disturbance model (Figure 2).  
344 This is in contrast to the predominant patterns across most studies on parasite diversity that  
345 found host richness to be the strongest predictor of parasite richness<sup>19-22</sup>. However, there  
346 could be potential deviations from this rule, particularly due to human impacts<sup>21,90,91</sup>. For  
347 instance, many human parasites may spillover to wildlife (anthropozoonoses) as humans  
348 regularly come in contact with wildlife<sup>92-97</sup>. Humans may also introduce many non-wildlife  
349 species such as feral dogs, cats in addition to livestock into wildlife habitats and these  
350 species may share parasites with wildlife<sup>26</sup>. In such cases, parasite richness in wildlife would  
351 be more than in the undisturbed fragments. Indeed, all but one (*Schistosoma sp.*) of the  
352 parasites that we found exclusively in plantations also occurred in cattle (Table 4).  
353 Surprisingly, wildlife parasite taxa that were present in the livestock foraging fragments did  
354 not occur in cattle samples from the same fragments. This was also the case for the wildlife  
355 parasites that only occurred in settlement but not in undisturbed fragments. We did not find  
356 any significant effect of host body mass on parasite diversity (Figure 2). This is in contrast  
357 many studies that found a significant relationship between these two variables<sup>98,99</sup>. On the  
358 other hand, many other empirical studies that did not find any relationship between body  
359 mass and parasite richness when accounting for host phylogenetic relationships<sup>100,101</sup>. Such  
360 contradictory results may suggest that relationship between host body mass and parasite  
361 diversity is a factor of body mass and life history traits, which vary between ecologically  
362 different groups of hosts<sup>22</sup>. Thus, the broad ecological diversity among host species in the  
363 present study might have confounded this relationship.

364         Our results did not find any significant effect of habitat fragmentation on parasite  
365 richness (Figure 2). This was expected as we did not find any effect of fragmentation on host

366 richness either. This lack of relationship between fragmentation and parasite diversity could  
367 also be an outcome of large home ranges and low habitat specialisation of most of the host  
368 species in our study. Many of the species that we sampled were large herbivores or  
369 carnivores (e.g., *Elephas maximus*, *Bos gaurus*, *Panthera tigris*, *Panthera pardus*) with large  
370 home range and they disperse across fragments. The level of fragment isolation (Median  
371 distance = 30.2 km) may not be a deterrent to their dispersal. Similarly, many host species in  
372 the study community such as *Macaca radiata*, *Sus scrofa*, *Viverricula indica*, are habitat  
373 generalists. According to the distribution-abundance relationship hypothesis<sup>6</sup>, smaller,  
374 fragmented habitats may be conducive for these generalist wildlife with high reproductive  
375 rates. These hosts may then spread parasites across habitats, independent of the level of  
376 habitat fragmentation.

377

#### 378 **CONCLUSION:**

379 With data on 40 parasites from 23 host species collected from 19 rainforest fragments with  
380 different types of land use change, we demonstrated that land use changes increased  
381 parasite diversity and presence of potential spillover of parasites from livestock to wildlife.  
382 We also showed that the observed pattern of parasite diversity was not driven by habitat  
383 fragmentation.

384 One of the limitations of this study was that it could not test the effect of land use change  
385 and habitat fragmentation on the relationship between host density and parasite diversity.  
386 Host density is an important predictor of parasite diversity and in nature, host density is  
387 linked to host ecology (e.g., home range). However, land use change can unpredictably  
388 change host density, which may have a complex outcome for parasite diversity. It will thus  
389 be worthwhile in future to explore this question in the present system. Additionally, with  
390 the present evidence of potential anthroponosis, it will be important in future to compare  
391 parasite from the present study to samples from humans, livestock and commensal animals  
392 in the fragments. Finally, as far as land use change and habitat fragmentation of wildlife  
393 habitats in India are concerned, the present study represents a case study with particular  
394 relevance for tropical rainforest habitats. However, there exists a large diversity in habitats  
395 and levels of disturbance in India. Given the increased threat to wildlife health from

396 anthropogenic environmental change, it will thus be crucial for wildlife conservation to  
397 study the patterns of parasite diversity in other types of habitats, especially those with  
398 already threatened wildlife.

399 **Data availability:** The datasets generated and analysed during the current study are  
400 available from the corresponding author on request.

401 **Acknowledgements:** DC gratefully acknowledges Steffen Foerster for initial discussions on  
402 model selection. DC also used part of Fulbright fellowship to work on the current paper, for  
403 which he gratefully acknowledges support of US-India Education Foundation (US-IEF), New  
404 Delhi. GU gratefully acknowledges funding awarded to him by Department of  
405 Biotechnology, Government of India (Ref. No. BTPR4503/BCE/8/899/2012 dated 09-11-  
406 2012).

407 **Author Contributions:** Sampling and data collection were done by DMR, ST and DC. DC  
408 conducted data analysis and wrote manuscript. GU conceived, designed and lead the study,  
409 organised funding and reviewed the manuscript.

410 **Competing interests:** The authors declare no competing interests.

#### 411 **References:**

- 412 1. Foley, J. A. *et al.* Global consequences of land use. *science* **309**, 5706574 (2005).
- 413 2. Goudie, A. S. *Human impact on the natural environment.* (John Wiley & Sons, 2018).
- 414 3. Haddad, N. M. *et al.* Habitat fragmentation and its lasting impact on Earth's ecosystems.  
415 *Sci. Adv.* **1**, e1500052 (2015).
- 416 4. Dornelas, M. *et al.* Assemblage time series reveal biodiversity change but not systematic  
417 loss. *Science* **344**, 2966299 (2014).
- 418 5. McGill, B. J., Dornelas, M., Gotelli, N. J. & Magurran, A. E. Fifteen forms of  
419 biodiversity trend in the Anthropocene. *Trends Ecol. Evol.* **30**, 1046113 (2015).
- 420 6. Bordes, F. *et al.* Habitat fragmentation alters the properties of a host-parasite network:  
421 rodents and their helminths in South East Asia. *J. Anim. Ecol.* **84**, 125361263 (2015).
- 422 7. Keesing, F. *et al.* Impacts of biodiversity on the emergence and transmission of infectious  
423 diseases. *Nature* **468**, 647 (2010).

- 424 8. Wood, C. L., Sandin, S. A., Zgliczynski, B., Guerra, A. S. & Micheli, F. Fishing drives  
425 declines in fish parasite diversity and has variable effects on parasite abundance. *Ecology*  
426 **95**, 192961946 (2014).
- 427 9. Anderson, R. M., Jackson, H. C., May, R. M. & Smith, A. M. Population dynamics of fox  
428 rabies in Europe. *Nature* **289**, 765 (1981).
- 429 10. Wood, C. L. *et al.* Parasites alter community structure. *Proc. Natl. Acad. Sci.* **104**, 93356  
430 9339 (2007).
- 431 11. Kuris, A. M. *et al.* Ecosystem energetic implications of parasite and free-living biomass  
432 in three estuaries. *Nature* **454**, 515 (2008).
- 433 12. Dobson, A., Lafferty, K. D., Kuris, A. M., Hechinger, R. F. & Jetz, W. Homage to  
434 Linnaeus: how many parasites? How many hosts? *Proc. Natl. Acad. Sci.* **105**, 114826  
435 11489 (2008).
- 436 13. Bordes, F. & Morand, S. Parasite diversity: an overlooked metric of parasite pressures?  
437 *Oikos* **118**, 8016806 (2009).
- 438 14. Poulin, R. Parasite biodiversity revisited: frontiers and constraints. *Int. J. Parasitol.* **44**,  
439 5816589 (2014).
- 440 15. Dunn, R. R., Harris, N. C., Colwell, R. K., Koh, L. P. & Sodhi, N. S. The sixth mass  
441 coextinction: are most endangered species parasites and mutualists? *Proc. R. Soc. Lond.*  
442 *B Biol. Sci.* **276**, 303763045 (2009).
- 443 16. Dunn, R. R., Davies, T. J., Harris, N. C. & Gavin, M. C. Global drivers of human  
444 pathogen richness and prevalence. *Proc. R. Soc. Lond. B Biol. Sci.* **277**, 258762595  
445 (2010).
- 446 17. Jones, K. E. *et al.* Global trends in emerging infectious diseases. *Nature* **451**, 990 (2008).
- 447 18. Smith, K. F. *et al.* Global rise in human infectious disease outbreaks. *J. R. Soc. Interface*  
448 **11**, 20140950 (2014).
- 449 19. Dallas, T. A. *et al.* Gauging support for macroecological patterns in helminth parasites.  
450 *Glob. Ecol. Biogeogr.* **27**, 143761447 (2018).
- 451 20. Kamiya, T., O'dwyer, K., Nakagawa, S. & Poulin, R. Host diversity drives parasite  
452 diversity: meta-analytical insights into patterns and causal mechanisms. *Ecography* **37**,  
453 6896697 (2014).
- 454 21. Krasnov, B. R., Shenbrot, G. I., Khokhlova, I. S. & Degen, A. A. Relationship between  
455 host diversity and parasite diversity: flea assemblages on small mammals. *J. Biogeogr.*  
456 **31**, 185761866 (2004).

- 457 22. Morand, S. (macro-) Evolutionary ecology of parasite diversity: From determinants of  
458 parasite species richness to host diversification. *Int. J. Parasitol. Parasites Wildl.* **4**, 806  
459 87 (2015).
- 460 23. Lafferty, K. D. Environmental parasitology: what can parasites tell us about human  
461 impacts on the environment? *Parasitol. Today* **13**, 2516255 (1997).
- 462 24. Altizer, S., Nunn, C. L. & Lindenfors, P. Do threatened hosts have fewer parasites? A  
463 comparative study in primates. *J. Anim. Ecol.* **76**, 3046314 (2007).
- 464 25. Becker Daniel J., Hall Richard J., Forbes Kristian M., Plowright Raina K. & Altizer  
465 Sonia. Anthropogenic resource subsidies and host-parasite dynamics in wildlife. *Philos.*  
466 *Trans. R. Soc. B Biol. Sci.* **373**, 20170086 (2018).
- 467 26. Weinstein, S. B. & Lafferty, K. D. How do humans affect wildlife nematodes? *Trends*  
468 *Parasitol.* **31**, 2226227 (2015).
- 469 27. Gottdenker, N. L., Streicker, D. G., Faust, C. L. & Carroll, C. R. Anthropogenic land use  
470 change and infectious diseases: a review of the evidence. *Ecohealth* **11**, 6196632 (2014).
- 471 28. Brockerhoff, E. G., Jactel, H., Parrotta, J. A., Quine, C. P. & Sayer, J. Plantation forests  
472 and biodiversity: oxymoron or opportunity? *Biodivers. Conserv.* **17**, 9256951 (2008).
- 473 29. Solar, R. R. de C. *et al.* How pervasive is biotic homogenization in human-modified  
474 tropical forest landscapes? *Ecol. Lett.* **18**, 110861118 (2015).
- 475 30. Bali, A., Kumar, A. & Krishnaswamy, J. The mammalian communities in coffee  
476 plantations around a protected area in the Western Ghats, India. *Biol. Conserv.* **139**, 936  
477 102 (2007).
- 478 31. Wakker, E., Watch, S. & Rozario, J. de. Greasy palms: the social and ecological impacts  
479 of large-scale oil palm plantation development in Southeast Asia. *Greasy Palms Soc.*  
480 *Ecol. Impacts Large-Scale Oil Palm Plant. Dev. Southeast Asia* (2004).
- 481 32. Richardson, B. Plantation Infrastructure and Labor Mobility in Guiana and Trinidad.  
482 *Migr. Dev. Implic. For* 2056224 (1975).
- 483 33. McKinney, M. L. & Lockwood, J. L. Biotic homogenization: a few winners replacing  
484 many losers in the next mass extinction. *Trends Ecol. Evol.* **14**, 4506453 (1999).
- 485 34. Sih, A., Ferrari, M. C. & Harris, D. J. Evolution and behavioural responses to human-  
486 induced rapid environmental change. *Evol. Appl.* **4**, 3676387 (2011).
- 487 35. Muhly, T. B., Semeniuk, C., Massolo, A., Hickman, L. & Musiani, M. Human activity  
488 helps prey win the predator-prey space race. *PLoS One* **6**, e17050 (2011).
- 489 36. Berger, J. Fear, human shields and the redistribution of prey and predators in protected  
490 areas. *Biol. Lett.* **3**, 6206623 (2007).



- 491 37. Hebblewhite, M. *et al.* Human activity mediates a trophic cascade caused by wolves.  
492 *Ecology* **86**, 213562144 (2005).
- 493 38. Ripple, W. J. & Beschta, R. L. Linking a cougar decline, trophic cascade, and  
494 catastrophic regime shift in Zion National Park. *Biol. Conserv.* **133**, 3976408 (2006).
- 495 39. Samia, D. S., Nakagawa, S., Nomura, F., Rangel, T. F. & Blumstein, D. T. Increased  
496 tolerance to humans among disturbed wildlife. *Nat. Commun.* **6**, 8877 (2015).
- 497 40. Blumstein, D. T. Habituation and sensitization: new thoughts about old ideas. *Anim.*  
498 *Behav.* **120**, 2556262 (2016).
- 499 41. Gillespie, T. R. & Chapman, C. A. Forest fragmentation, the decline of an endangered  
500 primate, and changes in host-parasite interactions relative to an unfragmented forest. *Am.*  
501 *J. Primatol. Off. J. Am. Soc. Primatol.* **70**, 2226230 (2008).
- 502 42. Kowalewski, M. M. *et al.* Black and gold howler monkeys (*Alouatta caraya*) as sentinels  
503 of ecosystem health: patterns of zoonotic protozoa infection relative to degree of human  
504 primate contact. *Am. J. Primatol.* **73**, 75683 (2011).
- 505 43. McCallum, H. & Dobson, A. Disease, habitat fragmentation and conservation. *Proc. R.*  
506 *Soc. Lond. B Biol. Sci.* **269**, 204162049 (2002).
- 507 44. Lafferty, K. D. The evolution of trophic transmission. *Parasitol. Today* **15**, 1116115  
508 (1999).
- 509 45. Chakraborty, D. *et al.* Mammalian gastrointestinal parasites in rainforest remnants of  
510 Anamalai Hills, Western Ghats, India. *J. Biosci.* **40**, 3996406 (2015).
- 511 46. Hussain, S., Ram, M. S., Kumar, A., Shivaji, S. & Umapathy, G. Human presence  
512 increases parasitic load in endangered lion-tailed macaques (*Macaca silenus*) in its  
513 fragmented rainforest habitats in southern India. *PLoS One* **8**, e63685 (2013).
- 514 47. Wells, K., Smales, L. R., Kalko, E. K. & Pfeiffer, M. Impact of rain-forest logging on  
515 helminth assemblages in small mammals (Muridae, Tupaiidae) from Borneo. *J. Trop.*  
516 *Ecol.* **23**, 35643 (2007).
- 517 48. Mudappa, D. & Raman, T. S. *Beyond the borders: Wildlife conservation in landscapes*  
518 *fragmented by plantation crops in India*. 21 (Nature Conservation Foundation, 2012).
- 519 49. Mudappa, D. & Raman, T. S. Rainforest restoration and wildlife conservation on private  
520 lands in the Western Ghats. *Mak. Conserv. Work* 2106240 (2007).
- 521 50. Singh, M. *et al.* Distribution, population structure, and conservation of lion-tailed  
522 macaques (*Macaca silenus*) in the Anaimalai Hills, Western Ghats, India. *Am. J.*  
523 *Primatol. Off. J. Am. Soc. Primatol.* **57**, 916102 (2002).

- 524 51. Kumar, M. A., Mudappa, D. & Raman, T. S. Asian elephant *Elephas maximus* habitat  
525 use and ranging in fragmented rainforest and plantations in the Anamalai Hills, India.  
526 *Trop. Conserv. Sci.* **3**, 1436158 (2010).
- 527 52. Navya, R., Athreya, V., Mudappa, D. & Raman, T. S. Assessing leopard occurrence in  
528 the plantation landscape of Valparai, Anamalai Hills. *Curr. Sci.* **107**, 138161385 (2014).
- 529 53. Kumaraguru, A., Saravanamuthu, R., Brinda, K. & Asokan, S. Prey preference of large  
530 carnivores in Anamalai Tiger Reserve, India. *Eur. J. Wildl. Res.* **57**, 6276637 (2011).
- 531 54. Sidhu, S., Raghunathan, G., Mudappa, D. & Raman, T. R. Conflict to Coexistence:  
532 Human-Leopard Interactions in a Plantation Landscape in Anamalai Hills, India.  
533 *Conserv. Soc.* **15**, (2017).
- 534 55. Baskaran, N., Kannan, G., Anbarasan, U., Thapa, A. & Sukumar, R. A landscape-level  
535 assessment of Asian elephant habitat, its population and elephant-human conflict in the  
536 Anamalai hill ranges of southern Western Ghats, India. *Mamm. Biol.-Z. Für Säugetierkd.*  
537 **78**, 4706481 (2013).
- 538 56. Kumar, A. M., Malizia, N. & Koschinsky, J. *Spatial Analysis of Human-Elephant*  
539 *Conflicts in a Fragmented Tropical Landscape*. (GeoDa Center for Geospatial Analysis  
540 and Computation, 2011).
- 541 57. Chakraborty, D., Tiwari, S., Reddy, D. M. & Umapathy, G. Prevalence of gastrointestinal  
542 parasites in civets of fragmented rainforest patches in Anamalai Hills, Western Ghats,  
543 India. *J. Parasitol.* **102**, 4636467 (2016).
- 544 58. Tiwari, S., Reddy, D. M., Pradheeps, M., Sreenivasamurthy, G. S. & Umapathy, G.  
545 Prevalence and co-occurrence of gastrointestinal parasites in Nilgiri Langur  
546 (*Trachypithecus johnii*) of fragmented landscape in Anamalai Hills, Western Ghats,  
547 India. *Curr. Sci.* **113**, 2194 (2017).
- 548 59. Congreve, H. *The Anamalais*. (1942).
- 549 60. Umapathy, G. & Kumar, A. The occurrence of arboreal mammals in the rain forest  
550 fragments in the Anamalai Hills, south India. *Biol. Conserv.* **92**, 3116319 (2000).
- 551 61. Hellmann, J. J. & Fowler, G. W. Bias, precision, and accuracy of four measures of  
552 species richness. *Ecol. Appl.* **9**, 8246834 (1999).
- 553 62. Gillespie, T. R. Noninvasive assessment of gastrointestinal parasite infections in free-  
554 ranging primates. *Int. J. Primatol.* **27**, 1129 (2006).
- 555 63. Sloss, M. W., Kemp, R. L. & Zajac, A. M. Veterinary clinical parasitology. 1994. *Vet.*  
556 *Clin. Parasitol. Iowa State Univ. Press Google Sch.*
- 557 64. Foreyt, W. J. *Veterinary parasitology reference manual*. (John Wiley & Sons, 2013).

- 558 65. Poulin, R. Comparison of three estimators of species richness in parasite component  
559 communities. *J. Parasitol.* 4856490 (1998).
- 560 66. Bolker, B. M. *et al.* Generalized linear mixed models: a practical guide for ecology and  
561 evolution. *Trends Ecol. Evol.* **24**, 1276135 (2009).
- 562 67. Jones, K. E. *et al.* PanTHERIA: a species-level database of life history, ecology, and  
563 geography of extant and recently extinct mammals: Ecological Archives E090-184.  
564 *Ecology* **90**, 264862648 (2009).
- 565 68. Aho, K., Derryberry, D. & Peterson, T. Model selection for ecologists: the worldviews of  
566 AIC and BIC. *Ecology* **95**, 6316636 (2014).
- 567 69. Bates, D., Sarkar, D., Bates, M. D. & Matrix, L. The lme4 package. *R Package Version 2*,  
568 74 (2007).
- 569 70. Oksanen, J. *et al.* *Vegan: Community Ecology Package. R package vegan, vers. 2.2-1;*  
570 *2015.* (2018).
- 571 71. Bhagwat, S. A., Willis, K. J., Birks, H. J. B. & Whittaker, R. J. Agroforestry: a refuge for  
572 tropical biodiversity? *Trends Ecol. Evol.* **23**, 2616267 (2008).
- 573 72. Felton, A., Knight, E., Wood, J., Zammit, C. & Lindenmayer, D. A meta-analysis of  
574 fauna and flora species richness and abundance in plantations and pasture lands. *Biol.*  
575 *Conserv.* **143**, 5456554 (2010).
- 576 73. Ranganathan, J., Daniels, R. R., Chandran, M. S., Ehrlich, P. R. & Daily, G. C.  
577 Sustaining biodiversity in ancient tropical countryside. *Proc. Natl. Acad. Sci.* **105**,  
578 17852617854 (2008).
- 579 74. Sidhu, S., Shankar Raman, T. R. & Goodale, E. Effects of plantations and home-gardens  
580 on tropical forest bird communities and mixed-species bird flocks in the southern  
581 Western Ghats. *J. Bombay Nat. Hist. Soc.* **107**, 91 (2010).
- 582 75. MacArthur, R. H. & MacArthur, J. W. On bird species diversity. *Ecology* **42**, 5946598  
583 (1961).
- 584 76. Rosenzweig, M. L. *Species diversity in space and time.* (Cambridge University Press,  
585 1995).
- 586 77. Harvey, C. A. & Villalobos, J. A. G. Agroforestry systems conserve species-rich but  
587 modified assemblages of tropical birds and bats. *Biodivers. Conserv.* **16**, 225762292  
588 (2007).
- 589 78. Waltert, M., Bobo, K. S., Sainge, N. M., Fermon, H. & Mühlenberg, M. From forest to  
590 farmland: habitat effects on Afrotropical forest bird diversity. *Ecol. Appl.* **15**, 135161366  
591 (2005).

- 592 79. Waltert, M. *et al.* Assessing conservation values: biodiversity and endemism in tropical  
593 land use systems. *PLoS One* **6**, e16238 (2011).
- 594 80. Madhusudan, M. D. Recovery of wild large herbivores following livestock decline in a  
595 tropical Indian wildlife reserve. *J. Appl. Ecol.* **41**, 8586869 (2004).
- 596 81. Rannestad, O. T., Danielsen, T., Moe, S. R. & Stokke, S. Adjacent pastoral areas support  
597 higher densities of wild ungulates during the wet season than the Lake Mburo National  
598 Park in Uganda. *J. Trop. Ecol.* **22**, 6756683 (2006).
- 599 82. Sitters, J., Heitkönig, I. M., Holmgren, M. & Ojwang, G. S. Herded cattle and wild  
600 grazers partition water but share forage resources during dry years in East African  
601 savannas. *Biol. Conserv.* **142**, 7386750 (2009).
- 602 83. Khan, J. A. Conservation and management of Gir lion sanctuary and national park,  
603 Gujarat, India. *Biol. Conserv.* **73**, 1836188 (1995).
- 604 84. Vanthomme, H., Kolowski, J., Korte, L. & Alonso, A. Distribution of a community of  
605 mammals in relation to roads and other human disturbances in Gabon, Central Africa.  
606 *Conserv. Biol.* **27**, 2816291 (2013).
- 607 85. Fahrig, L. Habitat fragmentation: A long and tangled tale. *Glob. Ecol. Biogeogr.* **28**, 336  
608 41 (2019).
- 609 86. Fahrig, L. *et al.* Is habitat fragmentation bad for biodiversity? *Biol. Conserv.* **230**, 1796  
610 186 (2019).
- 611 87. Fletcher Jr, R. J. *et al.* Is habitat fragmentation good for biodiversity? *Biol. Conserv.* **226**,  
612 9615 (2018).
- 613 88. Simmonds, J. S., van Rensburg, B. J., Tulloch, A. I. & Maron, M. Landscape-specific  
614 thresholds in the relationship between species richness and natural land cover. *J. Appl.*  
615 *Ecol.* (2019).
- 616 89. Wintle, B. A. *et al.* Global synthesis of conservation studies reveals the importance of  
617 small habitat patches for biodiversity. *Proc. Natl. Acad. Sci.* **116**, 9096914 (2019).
- 618 90. Wood, C. L. & Johnson, P. T. How does space influence the relationship between host  
619 and parasite diversity? *J. Parasitol.* **102**, 4856495 (2016).
- 620 91. Wood, C. L. *et al.* Human impacts decouple a fundamental ecological relationship: The  
621 positive association between host diversity and parasite diversity. *Glob. Change Biol.* **24**,  
622 366663679 (2018).
- 623 92. Eley, R. M., Strum, S. C., Muchemi, G. & Reid, G. D. F. Nutrition, body condition,  
624 activity patterns, and parasitism of free-ranging troops of olive baboons (*Papio anubis*) in  
625 Kenya. *Am. J. Primatol.* **18**, 2096219 (1989).

- 626 93. Gillespie, T. R. & Chapman, C. A. Prediction of parasite infection dynamics in primate  
627 metapopulations based on attributes of forest fragmentation. *Conserv. Biol.* **20**, 4416448  
628 (2006).
- 629 94. Gillespie, T. R. *et al.* Demographic and ecological effects on patterns of parasitism in  
630 eastern chimpanzees (*Pan troglodytes schweinfurthii*) in Gombe National Park, Tanzania.  
631 *Am. J. Phys. Anthropol.* **143**, 5346544 (2010).
- 632 95. Howells, M. E., Pruetz, J. & Gillespie, T. R. Patterns of gastro-intestinal parasites and  
633 commensals as an index of population and ecosystem health: the case of sympatric  
634 Western chimpanzees (*Pan troglodytes verus*) and Guinea baboons (*Papio hamadryas*  
635 *papio*) at Fongoli, Senegal. *Am. J. Primatol.* **73**, 1736179 (2011).
- 636 96. Messenger, A. M., Barnes, A. N. & Gray, G. C. Reverse zoonotic disease transmission  
637 (zooanthroponosis): a systematic review of seldom-documented human biological threats  
638 to animals. *PloS One* **9**, e89055 (2014).
- 639 97. Sá, R. M. *et al.* Gastrointestinal symbionts of chimpanzees in Cantanhez National Park,  
640 Guinea-Bissau with respect to habitat fragmentation. *Am. J. Primatol.* **75**, 103261041  
641 (2013).
- 642 98. Bordes, F., Morand, S. & Ricardo, G. Bat fly species richness in Neotropical bats:  
643 correlations with host ecology and host brain. *Oecologia* **158**, 1096116 (2008).
- 644 99. Ezenwa, V. O., Price, S. A., Altizer, S., Vitone, N. D. & Cook, K. C. Host traits and  
645 parasite species richness in even and odd-toed hoofed mammals, Artiodactyla and  
646 Perissodactyla. *Oikos* **115**, 5266536 (2006).
- 647 100. Morand, S. & Poulin, R. Density, body mass and parasite species richness of  
648 terrestrial mammals. *Evol. Ecol.* **12**, 7176727 (1998).
- 649 101. Nunn, C. L., Altizer, S., Jones, K. E. & Sechrest, W. Comparative tests of parasite  
650 species richness in primates. *Am. Nat.* **162**, 5976614 (2003).

651

652

653

654

655

656

657 **Table 1.** Bootstrap estimate of host richness in each fragment of Anamalai hills, India

| <i>Fragment name</i> | <i>Bootstrap estimate<br/>of host species<br/>richness</i> | <i>SE</i>  | <i>Sample size</i> |
|----------------------|------------------------------------------------------------|------------|--------------------|
| Aliyar_dam           | <b>21.9</b>                                                | <b>0.8</b> | <b>210</b>         |
| Akkamalai            | <b>18.9</b>                                                | <b>0.7</b> | <b>199</b>         |
| Anaikundi            | <b>20.1</b>                                                | <b>0.8</b> | <b>150</b>         |
| Andiparai            | <b>22.6</b>                                                | <b>1</b>   | <b>256</b>         |
| Attakatty            | <b>11.7</b>                                                | <b>0.6</b> | <b>15</b>          |
| Iyerpadi             | <b>25.5</b>                                                | <b>1</b>   | <b>398</b>         |
| Karian_shola         | <b>25.3</b>                                                | <b>0.9</b> | <b>244</b>         |
| Korangumudi          | <b>24.9</b>                                                | <b>0.8</b> | <b>356</b>         |
| Monica_estate        | <b>20.4</b>                                                | <b>0.9</b> | <b>124</b>         |
| Monomboly            | <b>26.6</b>                                                | <b>1</b>   | <b>181</b>         |
| Nirar_dam            | <b>24.2</b>                                                | <b>0.9</b> | <b>167</b>         |
| Pannimedu            | <b>17.5</b>                                                | <b>1</b>   | <b>55</b>          |
| Puthuthottam         | <b>24.9</b>                                                | <b>0.8</b> | <b>426</b>         |
| Sethumadai           | <b>18.1</b>                                                | <b>0.9</b> | <b>65</b>          |
| Shekkalmudi          | <b>16.0</b>                                                | <b>0.8</b> | <b>42</b>          |
| Sirukundra           | <b>17.9</b>                                                | <b>0.8</b> | <b>127</b>         |
| Uralikal             | <b>11.5</b>                                                | <b>0.5</b> | <b>41</b>          |
| Varagaliyar          | <b>21.6</b>                                                | <b>1</b>   | <b>162</b>         |
| Varattuparai         | <b>23.4</b>                                                | <b>0.9</b> | <b>397</b>         |

658

659

660

661 **Table 2.** Comparison between two different models to explain bootstrap estimate of  
 662 parasite taxon richness in Anamalai hills, India

| <i>Models</i>                                                                  | <i>K</i> | <i>logLik</i> | <i>AIC</i> | <i>delta</i> | <i>weight</i> |
|--------------------------------------------------------------------------------|----------|---------------|------------|--------------|---------------|
| <i>Plantation + Settlement + Livestock +<br/>Host richness +Host body size</i> | 9        | -667.54       | 1353.07    | 0            | 0.887         |
| <i>Fragment size + Isolation index + Host<br/>richness +Host body size</i>     | 8        | -670.59       | 1357.19    | 4.112        | 0.113         |

663

664

665

666

667

668

669 **Table 3.** Comparison between two different models to explain bootstrap estimate of host  
 670 species richness in Anamalai hills, India

| <i>Models</i>                              | <i>K</i> | <i>logLik</i> | <i>AIC</i> | <i>delta</i> | <i>weight</i> |
|--------------------------------------------|----------|---------------|------------|--------------|---------------|
| <i>Plantation + Settlement + Livestock</i> | 5        | -46.73        | 103.47     | 0            | 0.971         |
| <i>Fragment size + Isolation index</i>     | 4        | -51.25        | 110.5      | 7.029        | 0.029         |

671

672

673

674 **Table 4.** Parasite taxa that were found only in disturbed or undisturbed fragments in  
 675 Anamalai hills, India. Highlighted parasite taxa were found in the corresponding fragment  
 676 group exclusively. 1. Current study; 2. Natural History Museum parasite database, London,  
 677 UK

| Parasite taxa                        | Parasite group     | Family                     | In livestock samples <sup>1</sup> | Known human case <sup>2</sup> |
|--------------------------------------|--------------------|----------------------------|-----------------------------------|-------------------------------|
| <b>Plantation only</b>               |                    |                            |                                   |                               |
| <b>Baylisascaris sp.</b>             | <b>Nematodes</b>   | <b>Ascaridoidea</b>        | <b>Present</b>                    | <b>present</b>                |
| <b>Nematodirus sp.</b>               | <b>Nematodes</b>   | <b>Trichostrongyloidea</b> | <b>Present</b>                    | <b>present</b>                |
| <b>Enterobius sp.</b>                | <b>Nematodes</b>   | <b>Oxyuroidea</b>          | <b>Present</b>                    | <b>present</b>                |
| Dictyocaulus sp.                     | Nematodes          | Trichostrongyloidea        | Absent                            | absent                        |
| Uncinaria sp.                        | Nematodes          | Ancylostomatoidea          | Absent                            | present                       |
| <b>Schistosoma sp.</b>               | <b>Trematodes</b>  | <b>Schistosomatidae</b>    | <b>Absent</b>                     | <b>present</b>                |
| Metastrongylus sp.                   | Nematodes          | Metastrongyloidea          | Absent                            | present                       |
| <b>Clonorchis sp.</b>                | <b>Trematodes</b>  | <b>Opisthorchiidae</b>     | <b>Present</b>                    | <b>present</b>                |
| <b>Toxoplasma sp.</b>                | <b>Apicomplexa</b> |                            | <b>Present</b>                    | <b>present</b>                |
| <b>Isospora sp.</b>                  | <b>Apicomplexa</b> |                            | <b>Present</b>                    | <b>present</b>                |
| Paragonimus sp.                      | Trematodes         | Paragonimidae              | Present                           | present                       |
| <b>Dipylidium sp.</b>                | <b>Cestodes</b>    | <b>Dilepididae</b>         | <b>Present</b>                    | <b>present</b>                |
| <b>Livestock presence only</b>       |                    |                            |                                   |                               |
| Dictyocaulus sp.                     | Nematodes          | Trichostrongyloidea        | Absent                            | absent                        |
| <b>Taenia sp.</b>                    | <b>Cestodes</b>    | <b>Taeniidae</b>           | <b>Absent</b>                     | <b>present</b>                |
| Metastrongylus sp.                   | Nematodes          | Metastrongyloidea          | Absent                            | present                       |
| <b>Undisturbed (Livestock) only</b>  |                    |                            |                                   |                               |
| Paragonimus                          | Trematodes         | Paragonimidae              | Present                           | present                       |
| <b>Settlement only</b>               |                    |                            |                                   |                               |
| Dictyocaulus sp.                     | Nematodes          | Trichostrongyloidea        | Absent                            | absent                        |
| Uncinaria sp.                        | Nematodes          | Ancylostomatoidea          | Absent                            | present                       |
| Metastrongylus sp.                   | Nematodes          | Metastrongyloidea          | Absent                            | present                       |
| <b>Undisturbed (Settlement) only</b> |                    |                            |                                   |                               |
| <b>Sarcocystis sp.</b>               | <b>Apicomplexa</b> |                            | <b>Present</b>                    | <b>present</b>                |

678

679

680



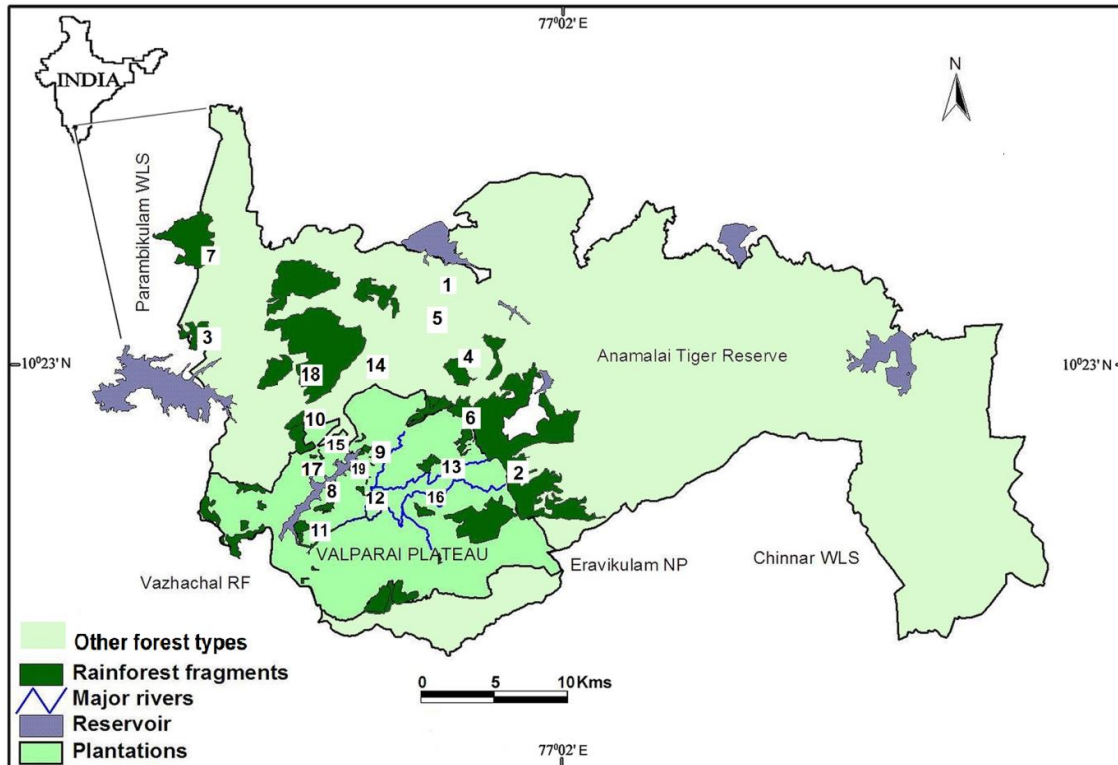

681

682 Figure 1. Map of Anamalai hills, Western Ghats, India with numbered study fragments. (1)  
683 Aliyar dam, 2) Akkamalai, 3) Anaikundi, 4) Andiparai, 5) Attakatty, 6) Iyerpadi 7)  
684 Karian\_shola, 8) Korangumudi, 9) Monica\_estate, 10) Monomboly, 11) Nirar\_dam, 12)  
685 Pannimedu, 13) Puthuthottam, 14) Sethumadai 15) Shekkalmudi 16) Sirukundra 17) Uralikal,  
686 18) Varagaliyar and 19) Varattuparai WLS: Wildlife sanctuary; RF: Reserve Forest; NP:  
687 National Park

688

689

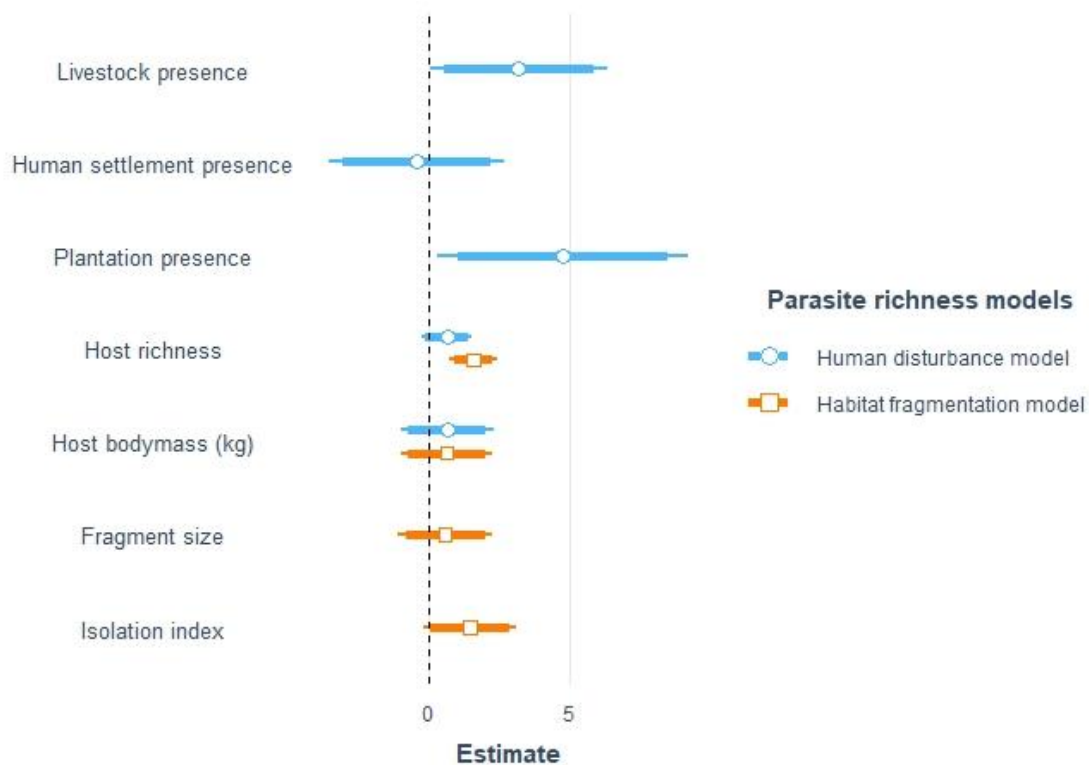

690

691 **Figure 2.** Unstandardized effect size of predictor variables on bootstrap estimate of parasite  
692 taxon richness in rainforest fragments of Anamalai hills, India. Estimates were plotted to  
693 scale. Intercepts were omitted to avoid distortion of scale. Disturbance model was the best  
694 fitted model based on AIC. Confidence intervals are represented by the lines around the  
695 points— thick ( $\alpha = 0.10$ ) and thin ( $\alpha = 0.05$ ).

696

697

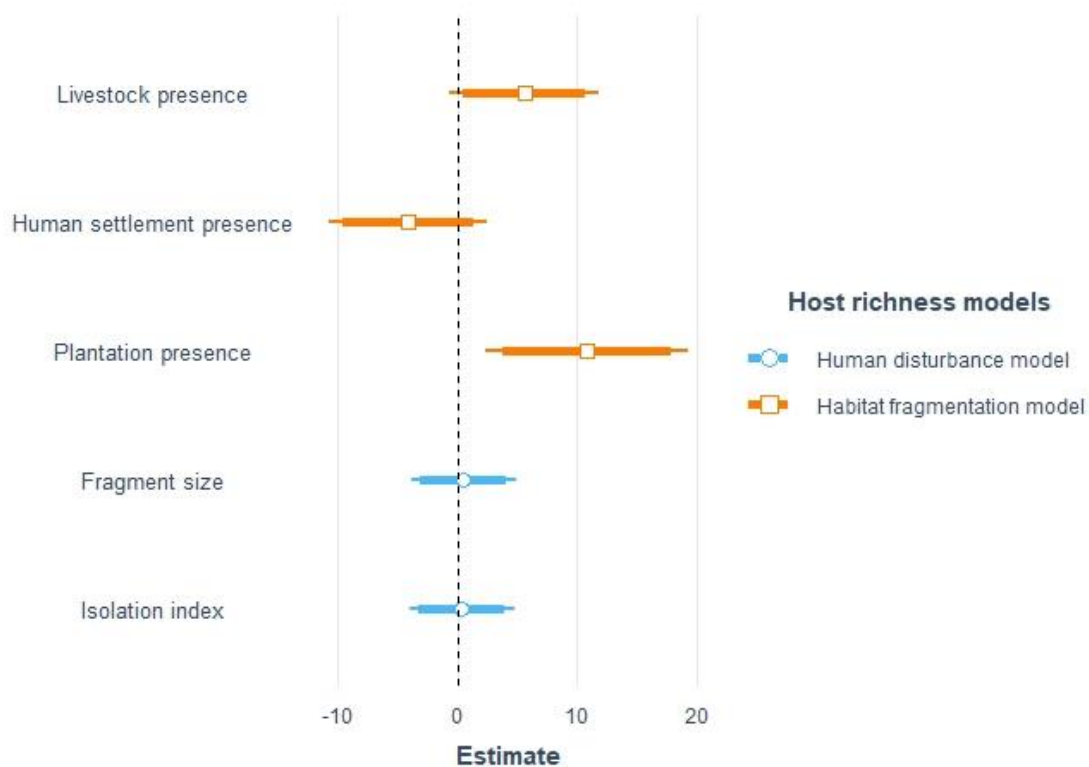

698

699 **Figure 3.** Unstandardized effect size of predictor variables on bootstrap estimate of host  
700 species richness in rainforest fragments of Anamalai hills, India. Estimates were plotted to  
701 scale. Intercepts were omitted to avoid distortion of scale. Disturbance model was the best  
702 fitted model based on AIC. Confidence intervals are represented by the lines around the  
703 points— thick ( $\alpha = 0.10$ ) and thin ( $\alpha = 0.05$ ). Host sample sizes are given in Table 1.

704

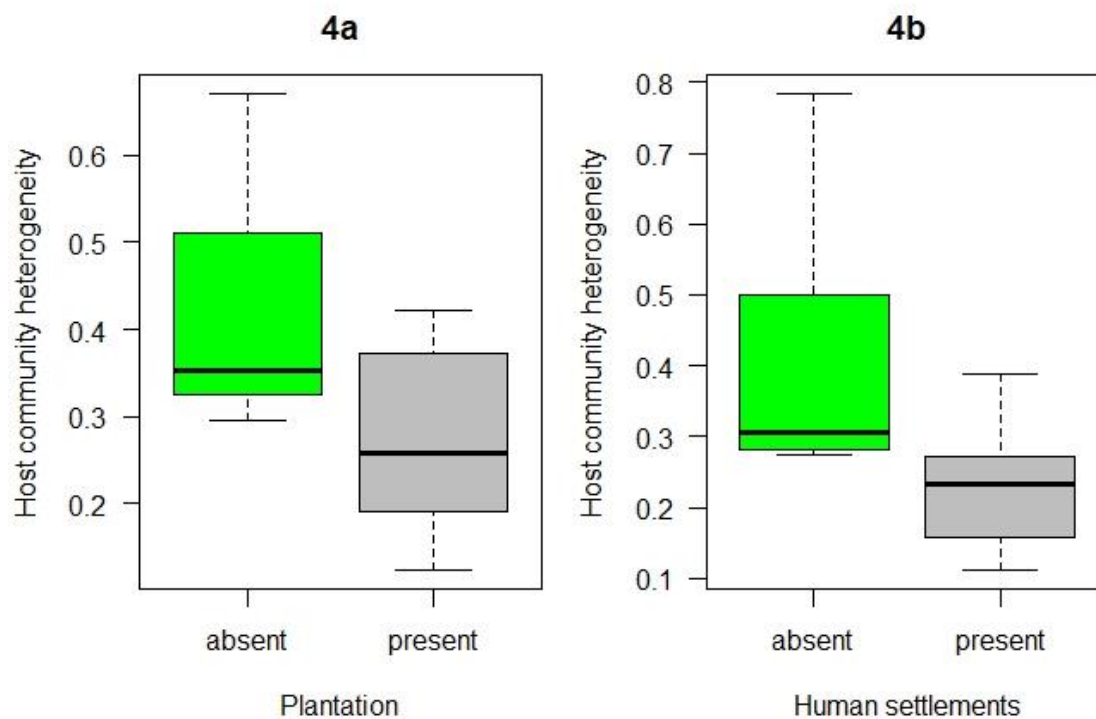

705

706 **Figure 4.** Host community heterogeneity between undisturbed (absent) and disturbed  
707 (present) rainforest fragments of Anamalai hills, India. Community heterogeneity is the  
708 within group dispersion values based on Jaccard distance for presence/absence data.

709
